# Supplementary material for: Post-transcriptional Regulation of Keratinocyte Progenitor Cell Expansion, Differentiation and Hair Follicle Regression by miR-22
Source: PubMed Central journal article supplement (PMC4447420; doi:10.1371/journal.pgen.1005253), 2015-05-28
Supplement: pgen.1005253.s011.pdf [file pgen.1005253.s011.pdf]

**S1 Table. List of 131 commonly downregulated genes between DTG and Catagen**

| Probe Set ID | Gene Symbol   | q-value   | Fold Change | Gene Title                                                                   |
|--------------|---------------|-----------|-------------|------------------------------------------------------------------------------|
| 1436398_at   | ---           | 0.0266675 | 0.5984      | ---                                                                          |
| 1440388_at   | ---           | 0         | 0.629       | ---                                                                          |
| 1452287_at   | ---           | 0.0338676 | 0.6075      | ---                                                                          |
| 1458880_at   | ---           | 0.0266675 | 0.6589      | ---                                                                          |
| 1447886_at   | 0610040B09Rik | 0         | 0.4048      | RIKEN cDNA 0610040B09 gene                                                   |
| 1417803_at   | 1110032A04Rik | 0         | 0.0428      | RIKEN cDNA 1110032A04 gene                                                   |
| 1430387_at   | 1810073O08Rik | 0         | 0.4612      | RIKEN cDNA 1810073O08 gene                                                   |
| 1429909_at   | 2600010E01Rik | 0.011749  | 0.6129      | RIKEN cDNA 2600010E01 gene                                                   |
| 1456210_at   | 5430407P10Rik | 0         | 0.5192      | RIKEN cDNA 5430407P10 gene                                                   |
| 1427118_at   | 5430421N21Rik | 0.0046807 | 0.084       | RIKEN cDNA 5430421N21 gene                                                   |
| 1457967_at   | A030003K21Rik | 0         | 0.0279      | RIKEN cDNA A030003K21 gene                                                   |
| 1422292_at   | A030005K14Rik | 0         | 0.0677      | RIKEN cDNA A030005K14 gene                                                   |
| 1421680_at   | A030005L19Rik | 0         | 0.025       | RIKEN cDNA A030005L19 gene                                                   |
| 1442425_at   | A030014E15Rik | 0         | 0.0198      | RIKEN cDNA A030014E15 gene                                                   |
| 1428273_at   | Abhd13        | 0.0151567 | 0.6586      | abhydrolase domain containing 13                                             |
| 1425559_a_at | Acsm3         | 0         | 0.4199      | acyl-CoA synthetase medium-chain family member 3                             |
| 1456901_at   | Adamts20      | 0         | 0.3295      | a disintegrin-like and metallopeptidase with thrombospondin type 1 motif, 20 |
| 1441094_at   | Adh6b         | 0         | 0.1273      | alcohol dehydrogenase 6B (class V)                                           |
| 1419549_at   | Arg1          | 0.036665  | 0.5066      | arginase, liver                                                              |
| 1422929_s_at | Atoh7         | 0.0413137 | 0.4411      | atonal homolog 7 (Drosophila)                                                |
| 1423753_at   | Bambi         | 0         | 0.2969      | BMP and activin membrane-bound inhibitor, homolog (Xenopus laevis)           |
| 1441991_at   | BC039632      | 0         | 0.4402      | cDNA sequence BC039632                                                       |
| 1449907_at   | Bcmo1         | 0.0046807 | 0.5019      | beta-carotene 15,15'-monooxygenase                                           |
| 1449873_at   | Bmp8a         | 0.0107895 | 0.5476      | bone morphogenetic protein 8a                                                |
| 1419225_at   | Cacna2d3      | 0         | 0.4987      | calcium channel, voltage-dependent, alpha2/delta subunit 3                   |
| 1449970_at   | Capn12        | 0.0130118 | 0.5295      | calpain 12                                                                   |
| 1425916_at   | Capn8         | 0         | 0.1694      | calpain 8                                                                    |
| 1428574_a_at | Chn2          | 0.0494965 | 0.6211      | chimerin (chimaerin) 2                                                       |
| 1449091_at   | Cldn8         | 0.0046807 | 0.3918      | claudin 8                                                                    |

|              |                    |           |                                                                             |
|--------------|--------------------|-----------|-----------------------------------------------------------------------------|
| 1418599_at   | Col11a1            | 0         | 0.5696 collagen, type XI, alpha 1                                           |
| 1450966_at   | Crot               | 0         | 0.6021 carnitine O-octanoyltransferase                                      |
| 1420686_at   | Cryba4             | 0         | 0.0992 crystallin, beta A4                                                  |
| 1416776_at   | Crym               | 0         | 0.1331 crystallin, mu                                                       |
| 1423845_at   | Csdc2              | 0.0429747 | 0.6213 cold shock domain containing C2, RNA binding                         |
| 1416563_at   | Ctps               | 0.0018723 | 0.5462 cytidine 5'-triphosphate synthase                                    |
| 1418989_at   | Ctse               | 0         | 0.1791 cathepsin E                                                          |
| 1439947_at   | Cyp11a1            | 0.0046807 | 0.3693 cytochrome P450, family 11, subfamily a, polypeptide 1               |
| 1431171_at   | D730001G18Rik      | 0         | 0.1079 RIKEN cDNA D730001G18 gene                                           |
| 1436532_at   | Dclk3              | 0         | 0.3595 doublecortin-like kinase 3                                           |
| 1450475_at   | Dlx3               | 0.0167986 | 0.6573 distal-less homeobox 3                                               |
| 1433596_at   | Dnajc6             | 0         | 0.3656 DnaJ (Hsp40) homolog, subfamily C, member 6                          |
| 1434297_at   | E130304F04Rik      | 0.0046807 | 0.503 RIKEN cDNA E130304F04 gene                                            |
| 1419555_at   | Elf5               | 0.0205577 | 0.4679 E74-like factor 5                                                    |
| 1418569_at   | Fblim1             | 0.0046807 | 0.6085 filamin binding LIM protein 1                                        |
| 1448470_at   | Fbp1               | 0         | 0.2789 fructose bisphosphatase 1                                            |
| 1435551_at   | Fhod3              | 0.0018723 | 0.4353 formin homology 2 domain containing 3                                |
| 1456815_at   | Foxn1              | 0.0046807 | 0.3623 forkhead box N1                                                      |
| 1451424_at   | Gabrp              | 0         | 0.1691 gamma-aminobutyric acid (GABA) A receptor, pi                        |
| 1424296_at   | Gclc               | 0.0167986 | 0.5938 glutamate-cysteine ligase, catalytic subunit                         |
| 1439793_at   | Gja3               | 0         | 0.1429 gap junction protein, alpha 3                                        |
| 1423271_at   | Gjb2               | 0.0213976 | 0.6236 gap junction protein, beta 2                                         |
| 1417422_at   | Gnmt               | 0         | 0.201 glycine N-methyltransferase                                           |
| 1420581_at   | Gpr143             | 0.0231974 | 0.5293 G protein-coupled receptor 143                                       |
| 1450875_at   | Gpr37              | 0.0167986 | 0.6059 G protein-coupled receptor 37                                        |
| 1437486_at   | Gprc5a             | 0         | 0.5652 G protein-coupled receptor, family C, group 5, member A              |
| 1420538_at   | Gprc5d             | 0         | 0.0458 G protein-coupled receptor, family C, group 5, member D              |
| 1435994_at   | Kcnh1              | 0.0018723 | 0.4185 potassium voltage-gated channel, subfamily H (eag-related), member 1 |
| 1429913_at   | Kcnk16             | 0.0250048 | 0.3823 potassium channel, subfamily K, member 16                            |
| 1436160_at   | Krt26              | 0         | 0.0604 keratin 26                                                           |
| 1430132_at   | Krt28              | 0.0046807 | 0.5623 keratin 28                                                           |
| 1427719_s_at | Krt2-ps1 /// Krt82 | 0         | 0.0469 keratin complex 2, basic, pseudogene 1 /// keratin 82                |
| 1421589_at   | Krt31              | 0         | 0.0472 keratin 31                                                           |
| 1420728_at   | Krt32              | 0         | 0.2079 keratin 32                                                           |

|              |                    |           |        |                                                                      |
|--------------|--------------------|-----------|--------|----------------------------------------------------------------------|
| 1449387_at   | Krt33a             | 0         | 0.0253 | keratin 33A                                                          |
| 1427179_at   | Krt33b             | 0         | 0.0369 | keratin 33B                                                          |
| 1418742_at   | Krt34              | 0         | 0.0174 | keratin 34                                                           |
| 1420409_at   | Krt35              | 0.0071795 | 0.4303 | keratin 35                                                           |
| 1419840_at   | Krt72              | 0         | 0.0796 | keratin 72                                                           |
| 1436557_at   | Krt73              | 0.0046807 | 0.59   | keratin 73                                                           |
| 1427378_at   | Krt75              | 0.0250048 | 0.4819 | keratin 75                                                           |
| 1427290_at   | Krt81              | 0         | 0.0641 | keratin 81                                                           |
| 1450536_s_at | Krtap12-1          | 0         | 0.0563 | keratin associated protein 12-1                                      |
| 1428007_at   | Krtap13-1          | 0         | 0.025  | keratin associated protein 13-1                                      |
| 1419707_at   | Krtap14            | 0         | 0.0078 | keratin associated protein 14                                        |
| 1419507_at   | Krtap15            | 0         | 0.0033 | keratin associated protein 15                                        |
| 1425655_at   | Krtap16-1          | 0         | 0.0051 | keratin associated protein 16-1                                      |
| 1427549_s_at | Krtap16-10 /// Kri | 0         | 0.0026 | keratin associated protein 16-10                                     |
| 1426203_at   | Krtap16-4          | 0         | 0.0366 | keratin associated protein 16-4                                      |
| 1425430_at   | Krtap16-5          | 0         | 0.0058 | keratin associated protein 16-5                                      |
| 1427800_at   | Krtap16-9          | 0         | 0.1417 | Keratin associated protein 16-9 (Krtap16-9), mRNA                    |
| 1450539_at   | Krtap5-1           | 0.0213976 | 0.2187 | keratin associated protein 5-1                                       |
| 1420452_at   | Krtap5-2           | 0         | 0.0268 | keratin associated protein 5-2                                       |
| 1430728_at   | Krtap5-5           | 0         | 0.0595 | keratin associated protein 5-5                                       |
| 1421689_at   | Krtap8-2           | 0         | 0.0059 | keratin associated protein 8-2                                       |
| 1450774_at   | Ly6g6d             | 0         | 0.0663 | lymphocyte antigen 6 complex, locus G6D                              |
| 1435461_at   | Magi3              | 0.0046807 | 0.6671 | membrane associated guanylate kinase, WW and PDZ domain containing 3 |
| 1435393_at   | Mc1r               | 0         | 0.421  | melanocortin 1 receptor                                              |
| 1448300_at   | Mgst3              | 0.0089345 | 0.6046 | microsomal glutathione S-transferase 3                               |
| 1430635_at   | Mlana              | 0         | 0.4554 | melan-A                                                              |
| 1449559_at   | Msx2               | 0.0440131 | 0.5313 | homeobox, msh-like 2                                                 |
| 1450645_at   | Mt4                | 0         | 0.1619 | metallothionein 4                                                    |
| 1456784_at   | OTTMUSG00000(      | 0         | 0.5371 | predicted gene, OTTMUSG00000015762                                   |
| 1417575_at   | Otub2              | 0.0305899 | 0.6286 | OTU domain, ubiquitin aldehyde binding 2                             |
| 1428615_at   | P2ry5              | 0.0122028 | 0.6538 | purinergic receptor P2Y, G-protein coupled, 5                        |
| 1419767_at   | Padi3              | 0         | 0.2537 | peptidyl arginine deiminase, type III                                |
| 1426453_at   | Pitrm1             | 0.0151567 | 0.6455 | pitrilysin metallopeptidase 1                                        |
| 1429183_at   | Pkp2               | 0.0071795 | 0.6157 | plakophilin 2                                                        |

|              |                  |           |                                                                                        |
|--------------|------------------|-----------|----------------------------------------------------------------------------------------|
| 1420664_s_at | Procr            | 0.0122028 | 0.3414 protein C receptor, endothelial                                                 |
| 1420467_at   | Psors1c2         | 0         | 0.1408 psoriasis susceptibility 1 candidate 2 (human)                                  |
| 1429262_at   | Rassf6           | 0.0322659 | 0.6173 Ras association (RalGDS/AF-6) domain family member 6                            |
| 1425114_at   | Rbbp6            | 0.011749  | 0.635 retinoblastoma binding protein 6                                                 |
| 1434628_a_at | Rhpn2            | 0         | 0.294 rhophilin, Rho GTPase binding protein 2                                          |
| 1452734_at   | Rnaset2a /// Rna | 0         | 0.6528 ribonuclease T2A /// ribonuclease T2B                                           |
| 1429321_at   | Rnf149           | 0.0046807 | 0.6612 ring finger protein 149                                                         |
| 1421856_at   | S100a3           | 0         | 0.1376 S100 calcium binding protein A3                                                 |
| 1418805_at   | Sct              | 0         | 0.3213 secretin                                                                        |
| 1450699_at   | Selenbp1         | 0.0205577 | 0.4476 selenium binding protein 1                                                      |
| 1424824_at   | Slain1           | 0         | 0.4318 SLAIN motif family, member 1                                                    |
| 1448502_at   | Slc16a7          | 0.0321469 | 0.5923 solute carrier family 16 (monocarboxylic acid transporters), member 7           |
| 1417750_a_at | Slc25a37         | 0.0213976 | 0.5343 solute carrier family 25, member 37                                             |
| 1448566_at   | Slc40a1          | 0         | 0.287 solute carrier family 40 (iron-regulated transporter), member 1                  |
| 1437430_at   | Slc45a2          | 0.0034597 | 0.3898 solute carrier family 45, member 2                                              |
| 1424338_at   | Slc6a13          | 0         | 0.2614 solute carrier family 6 (neurotransmitter transporter, GABA), member 13         |
| 1455442_at   | Slc6a19          | 0         | 0.4827 solute carrier family 6 (neurotransmitter transporter), member 19               |
| 1427787_at   | Sp6              | 0.0305899 | 0.4611 trans-acting transcription factor 6                                             |
| 1449287_at   | Srms             | 0.0046807 | 0.5707 src-related kinase lacking C-terminal tyrosine / N-terminal myristylation sites |
| 1456147_at   | St8sia6          | 0.0018723 | 0.3113 ST8 alpha-N-acetyl-neuraminide alpha-2,8-sialyltransferase 6                    |
| 1424938_at   | Steap1           | 0.0216197 | 0.5518 six transmembrane epithelial antigen of the prostate 1                          |
| 1422723_at   | Stra6            | 0.0466284 | 0.5343 stimulated by retinoic acid gene 6                                              |
| 1419289_a_at | Syng1            | 0.0046807 | 0.6498 synaptogyrin 1                                                                  |
| 1421594_a_at | Sytl2            | 0.0135855 | 0.55 synaptotagmin-like 2                                                              |
| 1427055_at   | Them4            | 0         | 0.5753 thioesterase superfamily member 4                                               |
| 1450958_at   | Tm4sf1           | 0.0046807 | 0.563 transmembrane 4 superfamily member 1                                             |
| 1418412_at   | Tpd52l1          | 0.0206235 | 0.6362 tumor protein D52-like 1                                                        |
| 1418935_at   | Trpm1            | 0.0223754 | 0.5194 transient receptor potential cation channel, subfamily M, member 1              |
| 1460239_at   | Tspan13          | 0.0223754 | 0.6691 tetraspanin 13                                                                  |
| 1448501_at   | Tspan6           | 0         | 0.5038 tetraspanin 6                                                                   |
| 1455377_at   | Ttll7            | 0.0034597 | 0.6254 tubulin tyrosine ligase-like family, member 7                                   |
| 1415978_at   | Tubb3            | 0.0122028 | 0.5236 tubulin, beta 3                                                                 |
| 1417717_a_at | Tyr              | 0.0250048 | 0.5877 tyrosinase                                                                      |
| 1428307_at   | Zdhhc13          | 0.0018723 | 0.6056 zinc finger, DHHC domain containing 13                                          |
