# Supplementary material for: Post-transcriptional Regulation of Keratinocyte Progenitor Cell Expansion, Differentiation and Hair Follicle Regression by miR-22
Source: PubMed Central journal article supplement (PMC4447420; doi:10.1371/journal.pgen.1005253), 2015-05-28
Supplement: pgen.1005253.s012.pdf [file pgen.1005253.s012.pdf]

**S2 Table. List of 153 commonly downregulated genes between DTG and Telogen**

| Probe Set ID           | Gene Symbol | q-value  | Fold Change | Gene Title                                                              |
|------------------------|-------------|----------|-------------|-------------------------------------------------------------------------|
| 1439794_ ---           |             | 0.021398 | 0.6495 ---  |                                                                         |
| 1444768_ ---           |             | 0        | 0.3062 ---  |                                                                         |
| 1419032_ 2610018G03Rik |             | 0.018363 | 0.6201      | RIKEN cDNA 2610018G03 gene                                              |
| 1455214_ Mitf          |             | 0.004878 | 0.6647      | microphthalmia-associated transcription factor                          |
| 1458467_ 1110032D16Rik |             | 0        | 0.0061      | RIKEN cDNA 1110032D16 gene                                              |
| 1429835_ 2310033E01Rik |             | 0        | 0.1886      | RIKEN cDNA 2310033E01 gene                                              |
| 1429960_ 4930438A08Rik |             | 0        | 0.3849      | RIKEN cDNA 4930438A08 gene                                              |
| 1456210_ 5430407P10Rik |             | 0        | 0.5192      | RIKEN cDNA 5430407P10 gene                                              |
| 1427118_ 5430421N21Rik |             | 0.004681 | 0.084       | RIKEN cDNA 5430421N21 gene                                              |
| 1429896_ 5830408B19Rik |             | 0        | 0.5752      | RIKEN cDNA 5830408B19 gene                                              |
| 1460517_ 9130409J20Rik |             | 0.025005 | 0.463       | RIKEN cDNA 9130409J20 gene                                              |
| 1457967_ A030003K21Rik |             | 0        | 0.0279      | RIKEN cDNA A030003K21 gene                                              |
| 1422292_ A030005K14Rik |             | 0        | 0.0677      | RIKEN cDNA A030005K14 gene                                              |
| 1421680_ A030005L19Rik |             | 0        | 0.025       | RIKEN cDNA A030005L19 gene                                              |
| 1442425_ A030014E15Rik |             | 0        | 0.0198      | RIKEN cDNA A030014E15 gene                                              |
| 1428273_ Abhd13        |             | 0.015157 | 0.6586      | abhydrolase domain containing 13                                        |
| 1425102_ Ace2          |             | 0        | 0.5152      | angiotensin I converting enzyme (peptidyl-dipeptidase A) 2              |
| 1456901_ Adamts20      |             | 0        | 0.3295      | a disintegrin-like metallopeptidase with thrombospondin type1 motif, 20 |
| 1456878_ A1646023      |             | 0        | 0.3429      | expressed sequence A1646023                                             |
| 1425163_ A1661453      |             | 0.046628 | 0.6351      | expressed sequence A1661453                                             |
| 1426300_ Alcam         |             | 0        | 0.6584      | activated leukocyte cell adhesion molecule                              |
| 1435154_ AU018091      |             | 0        | 0.1659      | expressed sequence AU018091                                             |
| 1420415_ AY026312      |             | 0        | 0.0059      | cDNA sequence AY026312                                                  |
| 1423753_ Bambi         |             | 0        | 0.2969      | BMP and activin membrane-bound inhibitor, homolog (Xenopus laevis)      |
| 1441991_ BC039632      |             | 0        | 0.4402      | cDNA sequence BC039632                                                  |
| 1449873_ Bmp8a         |             | 0.010789 | 0.5476      | bone morphogenetic protein 8a                                           |
| 1419225_ Cacna2d3      |             | 0        | 0.4987      | calcium channel, voltage-dependent, alpha2/delta subunit 3              |
| 1449970_ Capn12        |             | 0.013012 | 0.5295      | calpain 12                                                              |
| 1425916_ Capn8         |             | 0        | 0.1694      | calpain 8                                                               |
| 1448752_ Car2          |             | 0.027009 | 0.4018      | carbonic anhydrase 2                                                    |
| 1421001_ Car6          |             | 0.037391 | 0.2373      | carbonic anhydrase 6                                                    |
| 1439109_ Ccdc68        |             | 0.021398 | 0.5743      | coiled-coil domain containing 68                                        |
| 1451382_ Chac1         |             | 0.044013 | 0.3079      | ChaC, cation transport regulator-like 1 (E. coli)                       |
| 1453009_ Cpm           |             | 0        | 0.3008      | carboxypeptidase M                                                      |

|                            |          |        |                                                               |
|----------------------------|----------|--------|---------------------------------------------------------------|
| 1420686_Cryba4             | 0        | 0.0992 | crystallin, beta A4                                           |
| 1416776_Crym               | 0        | 0.1331 | crystallin, mu                                                |
| 1423845_Csdc2              | 0.042975 | 0.6213 | cold shock domain containing C2, RNA binding                  |
| 1418989_Ctse               | 0        | 0.1791 | cathepsin E                                                   |
| 1418457_Cxcl14             | 0.018767 | 0.648  | chemokine (C-X-C motif) ligand 14                             |
| 1428384_D4Bwg0951e         | 0.004681 | 0.6115 | DNA segment, Chr 4, Brigham & Women's Genetics 0951 expressed |
| 1431171_D730001G18Rik      | 0        | 0.1079 | RIKEN cDNA D730001G18 gene                                    |
| 1452070_Dedd2              | 0.025005 | 0.6432 | death effector domain-containing DNA binding protein 2        |
| 1450475_Dlx3               | 0.016799 | 0.6573 | distal-less homeobox 3                                        |
| 1450698_Dusp2              | 0        | 0.439  | dual specificity phosphatase 2                                |
| 1451924_Edn1               | 0.042975 | 0.6592 | endothelin 1                                                  |
| 1419555_Elf5               | 0.020558 | 0.4679 | E74-like factor 5                                             |
| 1420751_ENSMUSG00000       | 0        | 0.0041 | predicted gene, ENSMUSG00000068074                            |
| 1455188_Ephb1              | 0        | 0.5028 | Eph receptor B1                                               |
| 1449077_Eraf               | 0.00346  | 0.2509 | erythroid associated factor                                   |
| 1418773_Fads3              | 0.022375 | 0.5249 | fatty acid desaturase 3                                       |
| 1448470_Fbp1               | 0        | 0.2789 | fructose biphosphatase 1                                      |
| 1460296_Fgf22              | 0.020624 | 0.5266 | fibroblast growth factor 22                                   |
| 1435551_Fhod3              | 0.001872 | 0.4353 | formin homology 2 domain containing 3                         |
| 1445534_Flnb               | 0.007179 | 0.6268 | Filamin, beta, mRNA (cDNA clone IMAGE:3488025)                |
| 1453102_Flrt3              | 0.03059  | 0.6657 | fibronectin leucine rich transmembrane protein 3              |
| 1419485_Foxc1              | 0.00346  | 0.6409 | forkhead box C1                                               |
| 1456815_Foxn1              | 0.004681 | 0.3623 | forkhead box N1                                               |
| 1418207_Fxyd4              | 0.03059  | 0.295  | FXYD domain-containing ion transport regulator 4              |
| 1451424_Gabrp              | 0        | 0.1691 | gamma-aminobutyric acid (GABA) A receptor, pi                 |
| 1424296_Gclc               | 0.016799 | 0.5938 | glutamate-cysteine ligase, catalytic subunit                  |
| 1439793_Gja3               | 0        | 0.1429 | gap junction protein, alpha 3                                 |
| 1423271_Gjb2               | 0.021398 | 0.6236 | gap junction protein, beta 2                                  |
| 1420538_Gprc5d             | 0        | 0.0458 | G protein-coupled receptor, family C, group 5, member D       |
| 1439566_Gprin3             | 0.03059  | 0.6105 | GPRIN family member 3                                         |
| 1425874_Hoxc13             | 0.008934 | 0.5011 | homeo box C13                                                 |
| 1420640_Jmy                | 0.020624 | 0.5515 | junction-mediating and regulatory protein                     |
| 1429913_Kcnk16             | 0.025005 | 0.3823 | potassium channel, subfamily K, member 16                     |
| 1418173_Krt25              | 0.022375 | 0.5715 | keratin 25                                                    |
| 1436160_Krt26              | 0        | 0.0604 | keratin 26                                                    |
| 1449378_Krt27              | 0.00346  | 0.3423 | keratin 27                                                    |
| 1430132_Krt28              | 0.004681 | 0.5623 | keratin 28                                                    |
| 1427719_Krt2-ps1 /// Krt82 | 0        | 0.0469 | keratin complex 2, basic, pseudogene 1 /// keratin 82         |
| 1421589_Krt31              | 0        | 0.0472 | keratin 31                                                    |

|                           |          |        |                                                         |
|---------------------------|----------|--------|---------------------------------------------------------|
| 1420728_Krt32             | 0        | 0.2079 | keratin 32                                              |
| 1449387_Krt33a            | 0        | 0.0253 | keratin 33A                                             |
| 1427179_Krt33b            | 0        | 0.0369 | keratin 33B                                             |
| 1418742_Krt34             | 0        | 0.0174 | keratin 34                                              |
| 1420409_Krt35             | 0.007179 | 0.4303 | keratin 35                                              |
| 1427751_Krt36             | 0.004681 | 0.345  | keratin 36                                              |
| 1448457_Krt71             | 0.025005 | 0.45   | keratin 71                                              |
| 1419840_Krt72             | 0        | 0.0796 | keratin 72                                              |
| 1436557_Krt73             | 0.004681 | 0.59   | keratin 73                                              |
| 1427378_Krt75             | 0.025005 | 0.4819 | keratin 75                                              |
| 1427290_Krt81             | 0        | 0.0641 | keratin 81                                              |
| 1450536_Krtap12-1         | 0        | 0.0563 | keratin associated protein 12-1                         |
| 1428007_Krtap13-1         | 0        | 0.025  | keratin associated protein 13-1                         |
| 1419707_Krtap14           | 0        | 0.0078 | keratin associated protein 14                           |
| 1419507_Krtap15           | 0        | 0.0033 | keratin associated protein 15                           |
| 1425655_Krtap16-1         | 0        | 0.0051 | keratin associated protein 16-1                         |
| 1427549_Krtap16-10 /// Kr | 0        | 0.0026 | keratin associated protein 16-10                        |
| 1426203_Krtap16-4         | 0        | 0.0366 | keratin associated protein 16-4                         |
| 1425430_Krtap16-5         | 0        | 0.0058 | keratin associated protein 16-5                         |
| 1421691_Krtap16-7         | 0        | 0.0116 | keratin associated protein 16-7                         |
| 1425237_Krtap16-8         | 0        | 0.0024 | keratin associated protein 16-8                         |
| 1427800_Krtap16-9         | 0        | 0.1417 | Keratin associated protein 16-9 (Krtap16-9), mRNA       |
| 1427366_Krtap3-1          | 0.004681 | 0.1458 | keratin associated protein 3-1                          |
| 1430625_Krtap3-2          | 0.02162  | 0.322  | keratin associated protein 3-2                          |
| 1452957_Krtap3-3          | 0        | 0.0747 | keratin associated protein 3-3                          |
| 1430669_Krtap4-7          | 0        | 0.0166 | keratin associated protein 4-7                          |
| 1450539_Krtap5-1          | 0.021398 | 0.2187 | keratin associated protein 5-1                          |
| 1420452_Krtap5-2          | 0        | 0.0268 | keratin associated protein 5-2                          |
| 1430728_Krtap5-5          | 0        | 0.0595 | keratin associated protein 5-5                          |
| 1451859_Krtap6-1          | 0        | 0.0046 | keratin associated protein 6-1                          |
| 1449919_Krtap6-2          | 0        | 0.0146 | keratin associated protein 6-2                          |
| 1427842_Krtap6-3          | 0        | 0.0152 | keratin associated protein 6-3                          |
| 1427211_Krtap8-1          | 0        | 0.0137 | keratin associated protein 8-1                          |
| 1421689_Krtap8-2          | 0        | 0.0059 | keratin associated protein 8-2                          |
| 1450774_Ly6g6d            | 0        | 0.0663 | lymphocyte antigen 6 complex, locus G6D                 |
| 1441481_Mfap3l            | 0.049496 | 0.6572 | microfibrillar-associated protein 3-like                |
| 1423265_Minpp1            | 0.004681 | 0.5762 | multiple inositol polyphosphate histidine phosphatase 1 |
| 1422975_Mme               | 0        | 0.4674 | membrane metallo endopeptidase                          |
| 1449559_Msx2              | 0.044013 | 0.5313 | homeobox, msh-like 2                                    |

|                       |          |        |                                                                                |
|-----------------------|----------|--------|--------------------------------------------------------------------------------|
| 1417520_Nfe2l3        | 0.00346  | 0.5737 | nuclear factor, erythroid derived 2, like 3                                    |
| 1422790_Nppc          | 0.018767 | 0.365  | natriuretic peptide precursor type C                                           |
| 1443043_Otop2         | 0        | 0.2247 | otopetrin 2                                                                    |
| 1456784_OTTMUSG000001 | 0        | 0.5371 | predicted gene, OTTMUSG00000015762                                             |
| 1417575_Otub2         | 0.03059  | 0.6286 | OTU domain, ubiquitin aldehyde binding 2                                       |
| 1419323_Padi1         | 0.004681 | 0.2153 | peptidyl arginine deiminase, type I                                            |
| 1419767_Padi3         | 0        | 0.2537 | peptidyl arginine deiminase, type III                                          |
| 1453283_Pgm1          | 0.004681 | 0.5432 | phosphoglucomutase 1                                                           |
| 1435462_Plcxd2        | 0.020558 | 0.5141 | phosphatidylinositol-specific phospholipase C, X domain containing 2           |
| 1447807_Plekhh1       | 0.016799 | 0.6692 | pleckstrin homology domain containing, familyH (with MyTH4 domain) member1     |
| 1420467_Psors1c2      | 0        | 0.1408 | psoriasis susceptibility 1 candidate 2 (human)                                 |
| 1429262_Rassf6        | 0.032266 | 0.6173 | Ras association (RalGDS/AF-6) domain family member 6                           |
| 1425114_Rbbp6         | 0.011749 | 0.635  | retinoblastoma binding protein 6                                               |
| 1434628_Rhpn2         | 0        | 0.294  | rhopilin, Rho GTPase binding protein 2                                         |
| 1429321_Rnf149        | 0.004681 | 0.6612 | ring finger protein 149                                                        |
| 1441793_Rnf39         | 0.026668 | 0.6272 | Ring finger protein 39 (Rnf39), mRNA                                           |
| 1419814_S100a1        | 0        | 0.6379 | S100 calcium binding protein A1                                                |
| 1421856_S100a3        | 0        | 0.1376 | S100 calcium binding protein A3                                                |
| 1420764_Scrg1         | 0.004878 | 0.538  | scrapie responsive gene 1                                                      |
| 1420918_Sgk3          | 0.001872 | 0.6105 | serum/glucocorticoid regulated kinase 3                                        |
| 1424824_Slain1        | 0        | 0.4318 | SLAIN motif family, member 1                                                   |
| 1417750_Slc25a37      | 0.021398 | 0.5343 | solute carrier family 25, member 37                                            |
| 1448566_Slc40a1       | 0        | 0.287  | solute carrier family 40 (iron-regulated transporter), member 1                |
| 1416464_Slc4a1        | 0.031133 | 0.4146 | solute carrier family 4 (anion exchanger), member 1                            |
| 1455442_Slc6a19       | 0        | 0.4827 | solute carrier family 6 (neurotransmitter transporter), member 19              |
| 1417929_Slc7a8        | 0.012203 | 0.572  | solute carrier family 7 (cationic amino acid transporter, y+ system), member 8 |
| 1460616_Slco4c1       | 0.00346  | 0.3654 | solute carrier organic anion transporter family, member 4C1                    |
| 1456883_Stox1         | 0.004681 | 0.2466 | storkhead box 1                                                                |
| 1421594_Sytl2         | 0.013586 | 0.55   | synaptotagmin-like 2                                                           |
| 1434425_Tchh          | 0        | 0.3016 | trichohyalin                                                                   |
| 1429944_Tchhl1        | 0        | 0.0176 | trichohyalin-like 1                                                            |
| 1437702_Tgm6          | 0        | 0.5019 | transglutaminase 6                                                             |
| 1450958_Tm4sf1        | 0.004681 | 0.563  | transmembrane 4 superfamily member 1                                           |
| 1454709_Tmem64        | 0.013012 | 0.67   | transmembrane protein 64                                                       |
| 1458871_Tmprss11e     | 0.004681 | 0.5132 | transmembrane protease, serine 11e                                             |
| 1456623_Tpm1          | 0.013012 | 0.6434 | tropomyosin 1, alpha                                                           |
| 1419615_Trpv6         | 0.025005 | 0.5695 | transient receptor potential cation channel, subfamily V, member 6             |
| 1453269_Unc5b         | 0.015157 | 0.6681 | unc-5 homolog B (C. elegans)                                                   |
| 1448562_Upp1          | 0        | 0.2207 | uridine phosphorylase 1                                                        |

|                 |          |        |                                        |
|-----------------|----------|--------|----------------------------------------|
| 1428307_Zdhhc13 | 0.001872 | 0.6056 | zinc finger, DHHC domain containing 13 |
| 1420944_Zfp185  | 0.02162  | 0.6231 | zinc finger protein 185                |

---
