# Supplementary material for: Post-transcriptional Regulation of Keratinocyte Progenitor Cell Expansion, Differentiation and Hair Follicle Regression by miR-22
Source: PubMed Central journal article supplement (PMC4447420; doi:10.1371/journal.pgen.1005253), 2015-05-28
Supplement: pgen.1005253.s013.pdf [file pgen.1005253.s013.pdf]

**S3 Table. List of 74 commonly downregulated genes among DTG, Catagen and Telogen**

| Probe Set ID               | Gene Symbol | q-value | Fold Change | Gene Title                                                                   |
|----------------------------|-------------|---------|-------------|------------------------------------------------------------------------------|
| 1456210_5430407P10Rik      |             | 0       | 0.5192      | RIKEN cDNA 5430407P10 gene                                                   |
| 1427118_5430421N21Rik      |             | 0.0047  | 0.084       | RIKEN cDNA 5430421N21 gene                                                   |
| 1457967_A030003K21Rik      |             | 0       | 0.0279      | RIKEN cDNA A030003K21 gene                                                   |
| 1422292_A030005K14Rik      |             | 0       | 0.0677      | RIKEN cDNA A030005K14 gene                                                   |
| 1421680_A030005L19Rik      |             | 0       | 0.025       | RIKEN cDNA A030005L19 gene                                                   |
| 1442425_A030014E15Rik      |             | 0       | 0.0198      | RIKEN cDNA A030014E15 gene                                                   |
| 1428273_Abhd13             |             | 0.0152  | 0.6586      | abhydrolase domain containing 13                                             |
| 1456901_Adamts20           |             | 0       | 0.3295      | a disintegrin-like and metallopeptidase with thrombospondin type 1 motif, 20 |
| 1423753_Bambi              |             | 0       | 0.2969      | BMP and activin membrane-bound inhibitor, homolog ( <i>Xenopus laevis</i> )  |
| 1441991_BC039632           |             | 0       | 0.4402      | cDNA sequence BC039632                                                       |
| 1449873_Bmp8a              |             | 0.0108  | 0.5476      | bone morphogenetic protein 8a                                                |
| 1419225_Cacna2d3           |             | 0       | 0.4987      | calcium channel, voltage-dependent, alpha2/delta subunit 3                   |
| 1449970_Capn12             |             | 0.013   | 0.5295      | calpain 12                                                                   |
| 1425916_Capn8              |             | 0       | 0.1694      | calpain 8                                                                    |
| 1420686_Cryba4             |             | 0       | 0.0992      | crystallin, beta A4                                                          |
| 1416776_Crym               |             | 0       | 0.1331      | crystallin, mu                                                               |
| 1423845_Csdc2              |             | 0.043   | 0.6213      | cold shock domain containing C2, RNA binding                                 |
| 1418989_Ctse               |             | 0       | 0.1791      | cathepsin E                                                                  |
| 1431171_D730001G18Rik      |             | 0       | 0.1079      | RIKEN cDNA D730001G18 gene                                                   |
| 1450475_Dlx3               |             | 0.0168  | 0.6573      | distal-less homeobox 3                                                       |
| 1419555_Elf5               |             | 0.0206  | 0.4679      | E74-like factor 5                                                            |
| 1448470_Fbp1               |             | 0       | 0.2789      | fructose bisphosphatase 1                                                    |
| 1435551_Fhod3              |             | 0.0019  | 0.4353      | formin homology 2 domain containing 3                                        |
| 1456815_Foxn1              |             | 0.0047  | 0.3623      | forkhead box N1                                                              |
| 1451424_Gabrp              |             | 0       | 0.1691      | gamma-aminobutyric acid (GABA) A receptor, pi                                |
| 1424296_Gclc               |             | 0.0168  | 0.5938      | glutamate-cysteine ligase, catalytic subunit                                 |
| 1439793_Gja3               |             | 0       | 0.1429      | gap junction protein, alpha 3                                                |
| 1423271_Gjb2               |             | 0.0214  | 0.6236      | gap junction protein, beta 2                                                 |
| 1420538_Gprc5d             |             | 0       | 0.0458      | G protein-coupled receptor, family C, group 5, member D                      |
| 1429913_Kcnk16             |             | 0.025   | 0.3823      | potassium channel, subfamily K, member 16                                    |
| 1436160_Krt26              |             | 0       | 0.0604      | keratin 26                                                                   |
| 1430132_Krt28              |             | 0.0047  | 0.5623      | keratin 28                                                                   |
| 1427719_Krt2-ps1 /// Krt82 |             | 0       | 0.0469      | keratin complex 2, basic, pseudogene 1 /// keratin 82                        |

|                            |        |        |                                                                   |
|----------------------------|--------|--------|-------------------------------------------------------------------|
| 1421589_Krt31              | 0      | 0.0472 | keratin 31                                                        |
| 1420728_Krt32              | 0      | 0.2079 | keratin 32                                                        |
| 1449387_Krt33a             | 0      | 0.0253 | keratin 33A                                                       |
| 1427179_Krt33b             | 0      | 0.0369 | keratin 33B                                                       |
| 1418742_Krt34              | 0      | 0.0174 | keratin 34                                                        |
| 1420409_Krt35              | 0.0072 | 0.4303 | keratin 35                                                        |
| 1419840_Krt72              | 0      | 0.0796 | keratin 72                                                        |
| 1436557_Krt73              | 0.0047 | 0.59   | keratin 73                                                        |
| 1427378_Krt75              | 0.025  | 0.4819 | keratin 75                                                        |
| 1427290_Krt81              | 0      | 0.0641 | keratin 81                                                        |
| 1450536_Krtap12-1          | 0      | 0.0563 | keratin associated protein 12-1                                   |
| 1428007_Krtap13-1          | 0      | 0.025  | keratin associated protein 13-1                                   |
| 1419707_Krtap14            | 0      | 0.0078 | keratin associated protein 14                                     |
| 1419507_Krtap15            | 0      | 0.0033 | keratin associated protein 15                                     |
| 1425655_Krtap16-1          | 0      | 0.0051 | keratin associated protein 16-1                                   |
| 1427549_Krtap16-10 /// Krt | 0      | 0.0026 | keratin associated protein 16-10                                  |
| 1426203_Krtap16-4          | 0      | 0.0366 | keratin associated protein 16-4                                   |
| 1425430_Krtap16-5          | 0      | 0.0058 | keratin associated protein 16-5                                   |
| 1427800_Krtap16-9          | 0      | 0.1417 | Keratin associated protein 16-9 (Krtap16-9), mRNA                 |
| 1450539_Krtap5-1           | 0.0214 | 0.2187 | keratin associated protein 5-1                                    |
| 1420452_Krtap5-2           | 0      | 0.0268 | keratin associated protein 5-2                                    |
| 1430728_Krtap5-5           | 0      | 0.0595 | keratin associated protein 5-5                                    |
| 1421689_Krtap8-2           | 0      | 0.0059 | keratin associated protein 8-2                                    |
| 1450774_Ly6g6d             | 0      | 0.0663 | lymphocyte antigen 6 complex, locus G6D                           |
| 1449559_Msx2               | 0.044  | 0.5313 | homeobox, msh-like 2                                              |
| 1456784_OTTMUSG00000       | 0      | 0.5371 | predicted gene, OTTMUSG00000015762                                |
| 1417575_Otub2              | 0.0306 | 0.6286 | OTU domain, ubiquitin aldehyde binding 2                          |
| 1419767_Padi3              | 0      | 0.2537 | peptidyl arginine deiminase, type III                             |
| 1420467_Psors1c2           | 0      | 0.1408 | psoriasis susceptibility 1 candidate 2 (human)                    |
| 1429262_Rassf6             | 0.0323 | 0.6173 | Ras association (RalGDS/AF-6) domain family member 6              |
| 1425114_Rbbp6              | 0.0117 | 0.635  | retinoblastoma binding protein 6                                  |
| 1434628_Rhpn2              | 0      | 0.294  | rhopilin, Rho GTPase binding protein 2                            |
| 1429321_Rnf149             | 0.0047 | 0.6612 | ring finger protein 149                                           |
| 1421856_S100a3             | 0      | 0.1376 | S100 calcium binding protein A3                                   |
| 1424824_Slain1             | 0      | 0.4318 | SLAIN motif family, member 1                                      |
| 1417750_Slc25a37           | 0.0214 | 0.5343 | solute carrier family 25, member 37                               |
| 1448566_Slc40a1            | 0      | 0.287  | solute carrier family 40 (iron-regulated transporter), member 1   |
| 1455442_Slc6a19            | 0      | 0.4827 | solute carrier family 6 (neurotransmitter transporter), member 19 |
| 1421594_Sytl2              | 0.0136 | 0.55   | synaptotagmin-like 2                                              |

|                  |        |                                               |
|------------------|--------|-----------------------------------------------|
| 1450958_ Tm4sf1  | 0.0047 | 0.563 transmembrane 4 superfamily member 1    |
| 1428307_ Zdhhc13 | 0.0019 | 0.6056 zinc finger, DHHC domain containing 13 |

---
