# Supplementary material for: Post-transcriptional Regulation of Keratinocyte Progenitor Cell Expansion, Differentiation and Hair Follicle Regression by miR-22
Source: PubMed Central journal article supplement (PMC4447420; doi:10.1371/journal.pgen.1005253), 2015-05-28
Supplement: pgen.1005253.s014.pdf [file pgen.1005253.s014.pdf]

**S4 Table. The sequences of primer used in this paper**

| <b>Primer Name</b>      | <b>Sequence (5' to 3')</b>   |
|-------------------------|------------------------------|
| <i>Dlx3</i> -forward    | GTGCCTTAGGGGTAAGGCTGTCAG     |
| <i>Dlx3</i> -reverse    | GGGACCTGCTTCTCTTGGTTGCTC     |
| <i>Foxn1</i> -forward   | GGCCCTCAATCCTTCCAAAATCGAC    |
| <i>Foxn1</i> -reverse   | GCTGGATGCATTGGGTG-CAGAGG     |
| <i>Hoxc13</i> -forward  | TAAAGGAGATAGAGGGTGGGTCCCT    |
| <i>Hoxc13</i> -reverse  | CCACAGCACCAAGTTGGCTTTTGAG    |
| <i>Sostdc1</i> -forward | CCCAAATAAATCCCTCCGAACCAG     |
| <i>Sostdc1</i> -reverse | GCAGG-GGGATAATTTCACTGAG      |
| <i>K32</i> -forward     | GGAGTGTGAGATTGACACGTACAG     |
| <i>K32</i> -reverse     | CTTCAGTAGCGGGTCTGTAGGCA      |
| <i>K35</i> -forward     | GCAGTGCATGATCGGCAA-TGTGG     |
| <i>K35</i> -reverse     | GGTACGAGCTGCGCCCGTGCT        |
| <i>K85</i> -forward     | CCTGGGTCAAGGCA-TGATCCTAA     |
| <i>K85</i> -reverse     | AGAGTAGTTTGCCCCAAAGGAA       |
| <i>K17</i> -forward     | GGAGATCGCC-ACCTACCGCCGTC     |
| <i>K17</i> -reverse     | GTGATGCCGGAGCGGAGAGGGAAG     |
| <i>MMP11</i> -forward   | GCGGTTGGGAGTGGTGTGGTAAT      |
| <i>MMP11</i> -reverse   | GGCAAGGCTGTGAGGTATGTG        |
| <i>TGFB2</i> - forward  | GGATCCATGAACCCAAAGGGTAC      |
| <i>TGFB2</i> -reverse   | GCTGTTCGATCTTGGGCGTAT        |
| <i>K16</i> -forward     | CCTTGGAGAACAGCCTAGAAG        |
| <i>K16</i> -reverse     | ATTCTCGCCATCCAGCAGAC         |
| <i>Spink12</i> -forward | GCAGCAACTATGAGAAGACACTGG     |
| <i>Spink12</i> -reverse | TTGGTGGGAAGCAC-ACTGCTGTGG    |
| <i>Dlx3-F1</i>          | CCCTCGAGTGAGGGAACCTTTGATATCC |
| <i>Dlx3-R1</i>          | GCGGCCGCACATAAATAGGAAACCACAA |
| <i>Foxn1-F1</i>         | GCGATCGCGCAGGTGAACTGGCACCTCC |
| <i>Foxn1-R1</i>         | GCGGCCGCCAAGTCTGTAGAGCACATGG |
| <i>Hoxc13-F1</i>        | AGCTCGAGCGAACCTCTCGGAGCGTCAG |
| <i>Hoxc13-R1</i>        | GCGGCCGCACATTACACTGCCAGGCCCT |
| <i>Sostdc1-F1</i>       | GCCTCGAGCTAAATCCCTCCGAACCAGA |
| <i>Sostdc1-R1</i>       | GCGGCCGCCAATGTCTGCAAGCATGTAC |
